# Supplementary material
Source: PubMed Central journal article supplement (PMC1425856)

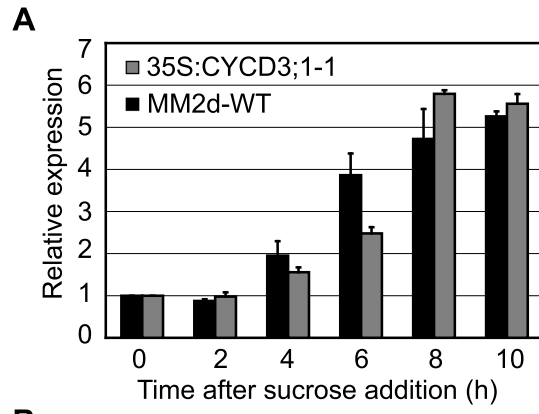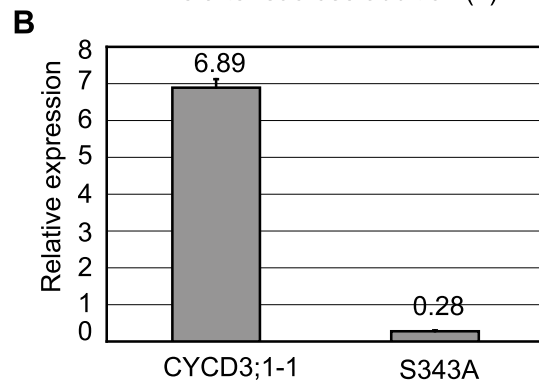

**Supplemental Figure 1**

Supplement: plntcell_tpc.105.039636_1.pdf [file plntcell_tpc.105.039636_1.pdf]
